# Supplementary material
Source: MDPI journal article supplement (https://www.mdpi.com/2071-1050/12/15/6252)
Supplement: s1 [file s1]

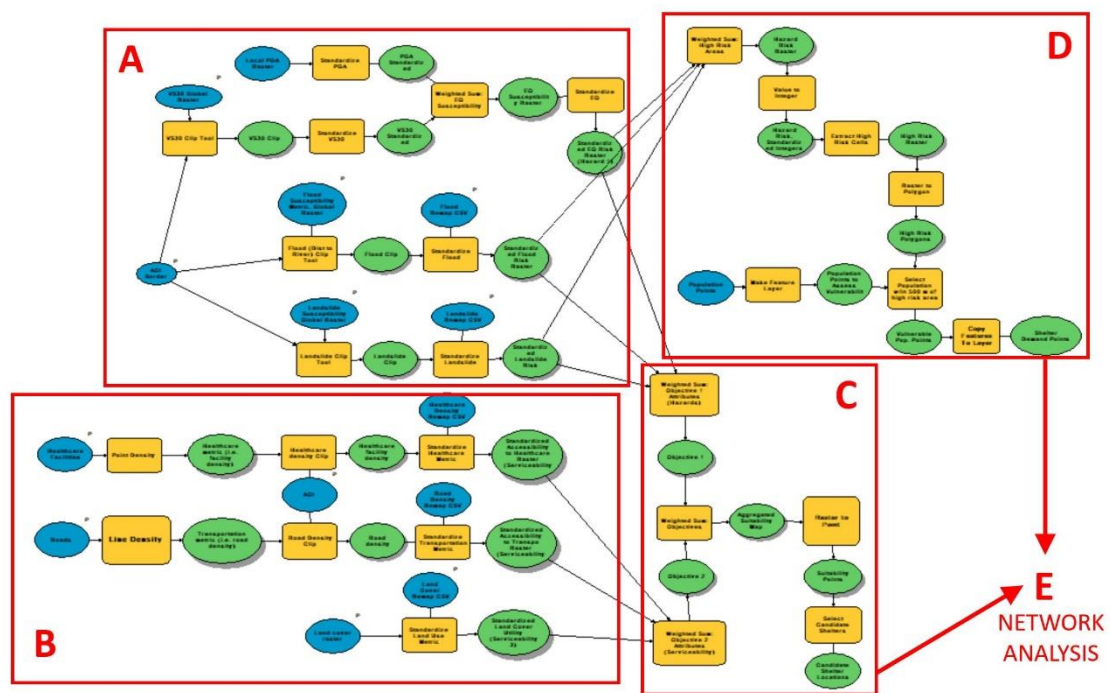

(a)

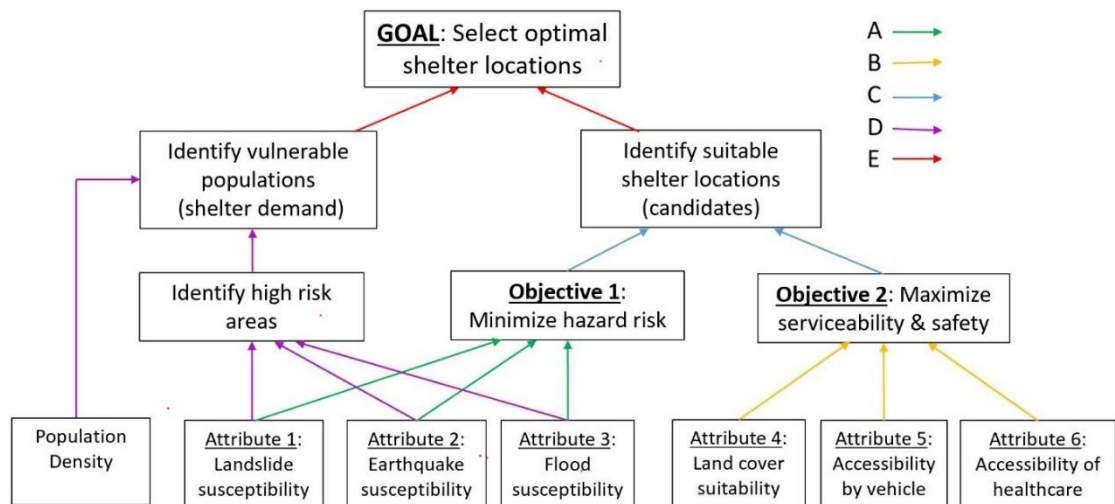

(b)

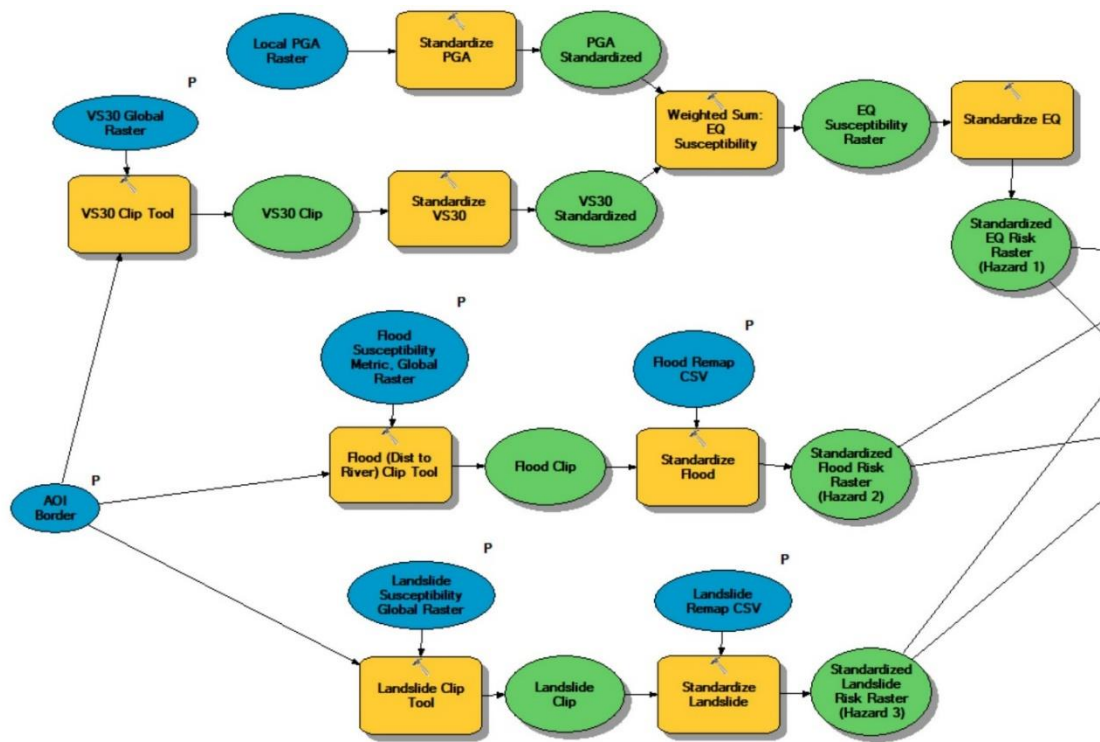

(c)

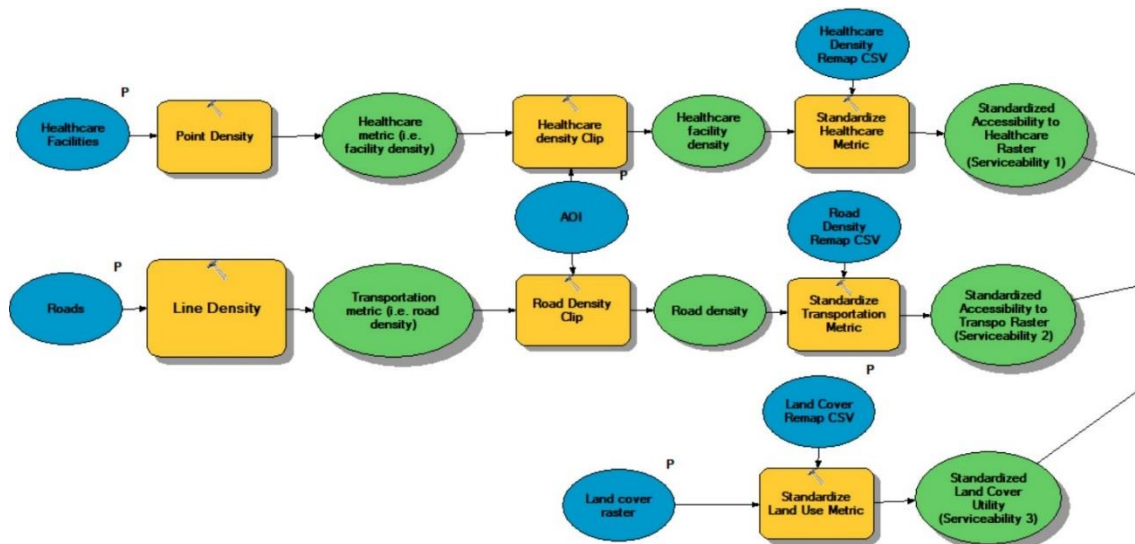

(d)

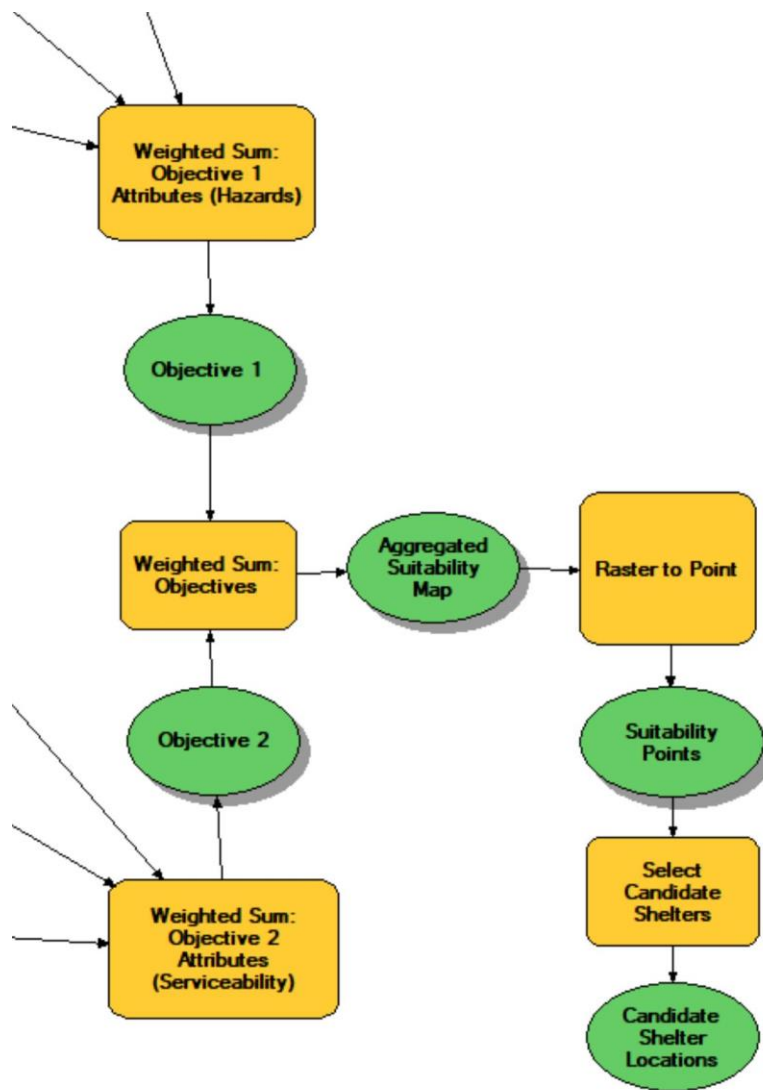

(e)

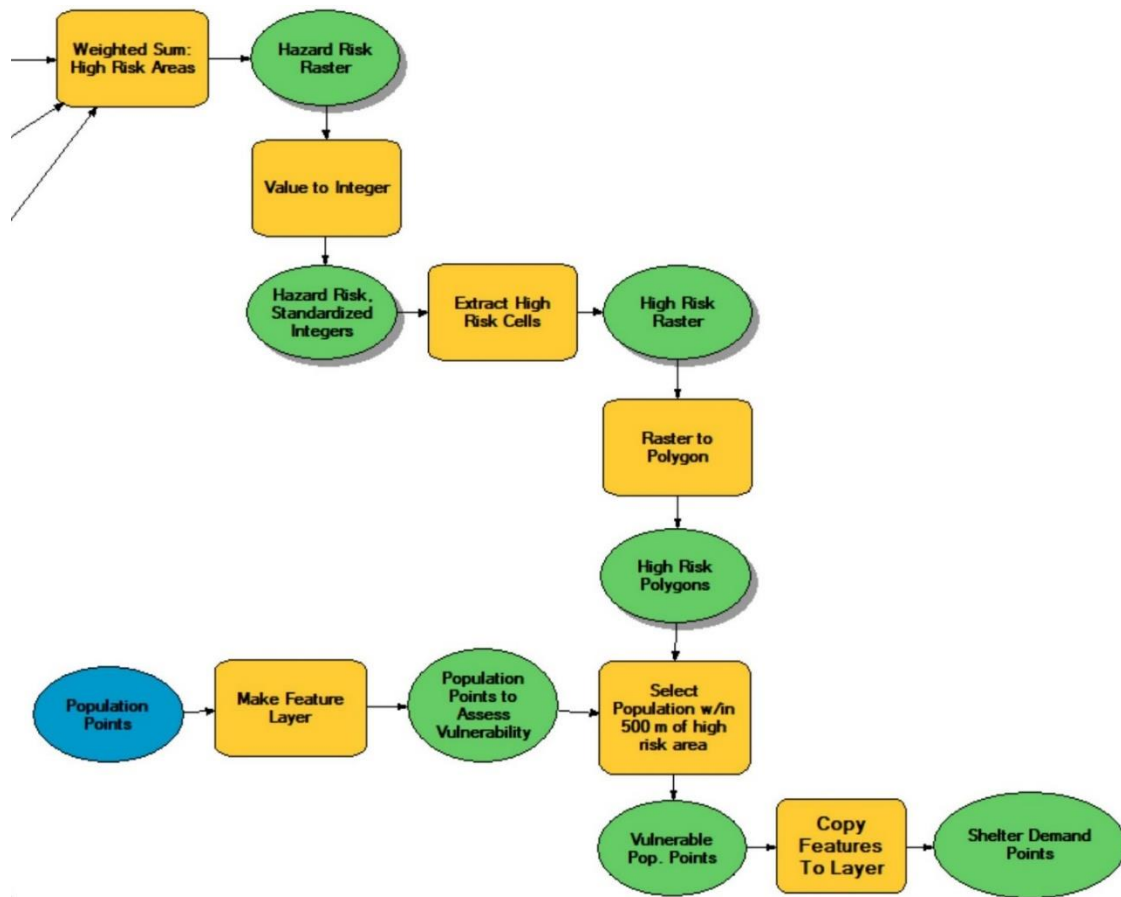

(f)

**Figure S1.** Automated AHP. (a) Model Builder tool; (b) Corresponding hierarchy components; (c) Detail of Model Builder section A; (d) Detail of Model Builder section B; (e) Detail of Model Builder section C; (f) Detail of Model Builder section D.
